# Supplementary material
Source: Springer Nature journal article supplement (https://www.springermedizin.de/resource/supplementary/12990_2008_184_MOESM5_ESM.pdf/9612758)

**A**

4hr

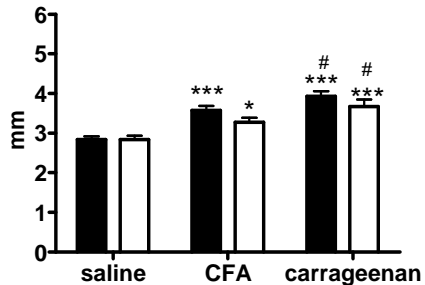

■ WT □ KO

**B**

Day 2

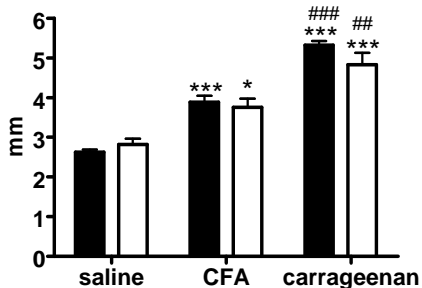**C**

Day 7

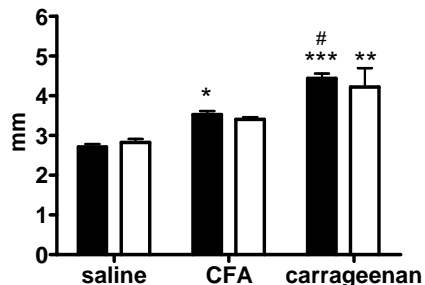

Supplement: MOESM5 [file 9612758]
